# Supplementary material for: X-ray Structure Determination, Antioxidant Voltammetry Studies of Butein and 2′,4′-Dihydroxy-3,4-dimethoxychalcone. Computational Studies of 4 Structurally Related 2′,4′-diOH Chalcones to Examine Their Antimalarial Activity by Binding to Falcipain-2
Source: MDPI journal article supplement (doi:10.3390/molecules26216511), 2021-10-28
Supplement: s1 [file s1]

## Supplementary material

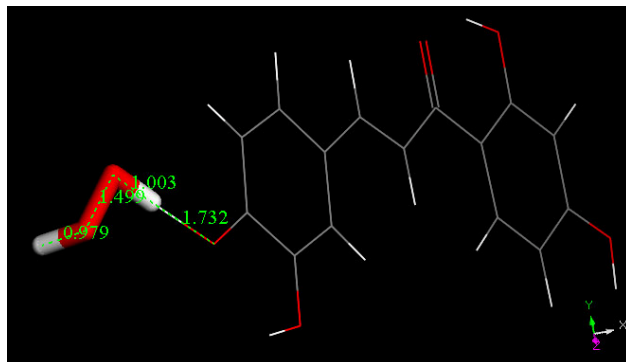

**Figure S1.** The structure shown in Figure 8 was approached by a proton, 2.60 Å apart from the O(superoxide) not engaged in H abstraction of Butein. After geometry optimization, formation of H<sub>2</sub>O<sub>2</sub> (stick style) was obtained with further separation from the semiquinone Butein species, 1.732 Å, compared with 1.597 Å in Figure 8.

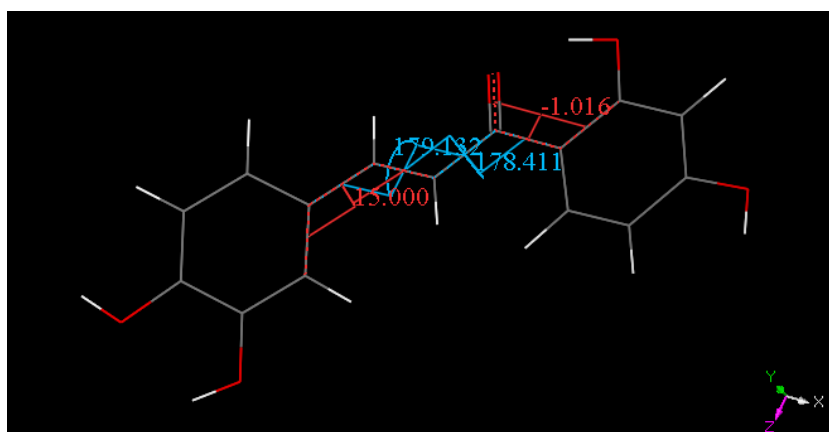

**Figure S2.** From DFT calculations, the Butein conformation is modified from the original catechol moiety torsion angle of 3.4° to 15°, and then a single point energy calculation is performed.

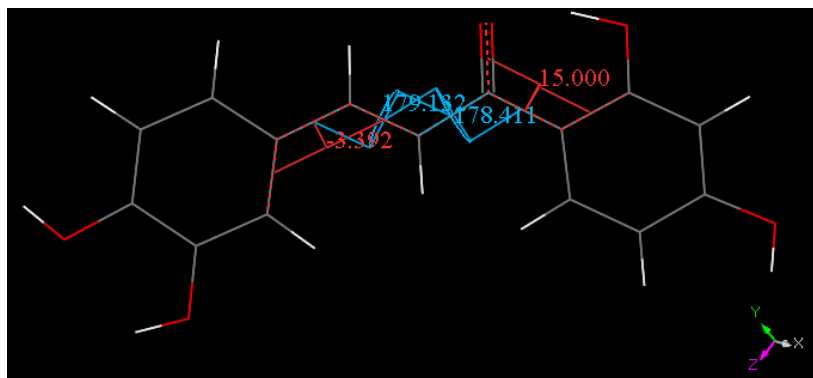

**Figure S3.** From DFT calculations, the Butein conformation is modified from the original non-catechol moiety torsion angle of  $-1.0^\circ$  to  $15^\circ$ , and then a single point energy calculation is performed, see also Table 3.

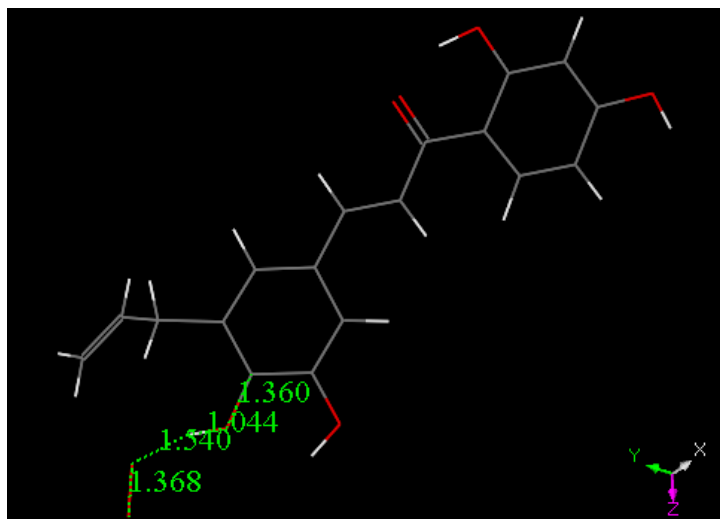

**Figure S4.** Geometry minimization of initially separated van der Waals 5-Prenylbutein and superoxide ( $2.60 \text{ \AA}$ ) does not show capture of H4(hydroxyl) by the radical, with bond distance between O(superoxide) and H4 =  $1.540 \text{ \AA}$ .

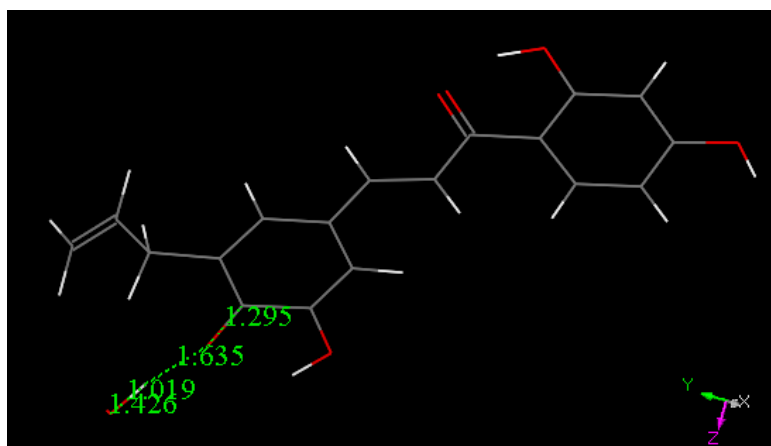

**Figure S5.** Geometry minimization of initially separated van der Waals 5-Prenylbutein semiquinone and  $\text{O}_2\text{H}$  ( $2.60 \text{ \AA}$ ) converges to this minimum showing higher energy than that of Figure S4 ( $3.4 \text{ kcal/mol}$ ), suggesting no capture of superoxide by 5-Prenylbutein.

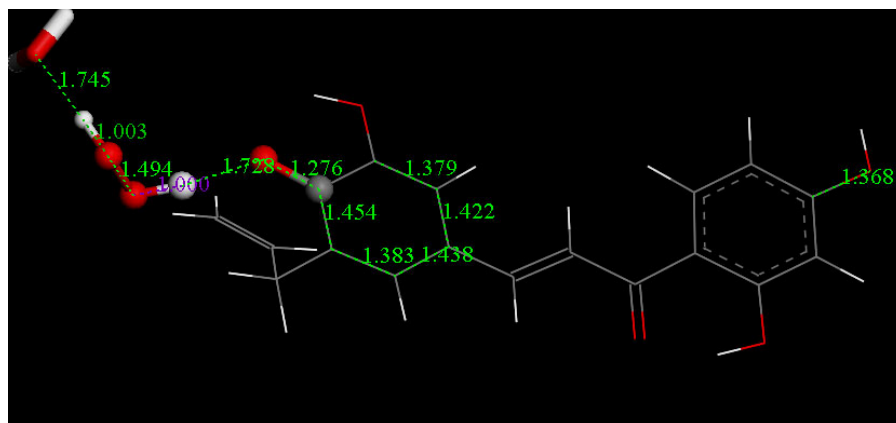

Figure S6. Geometry optimization obtained after placing  $[H_3O]^+$  to the  $O_2H$  moiety of Figure S4. The system evolves towards  $H_2O \cdots H_2O_2 \cdots 5$ -Prenylbutein-semiquinone, demonstrating 5-Prenyl capability of scavenging superoxide (one H atom of water is hidden by its linked O(atom) in this view). In the semiquinone ring the C-O bond length of 1.276 Å has a double bond character, shorter than 1.368 Å single bond on the non-catechol ring (ring A right side of the drawing). In addition, the former catechol ring shows loss of aromatization, due to extended conjugation, as short C-C bonds (1.383 Å and 1.379 Å), alternate with longer C-C bonds (1.454 Å, 1.422 Å, and 1.478 Å).

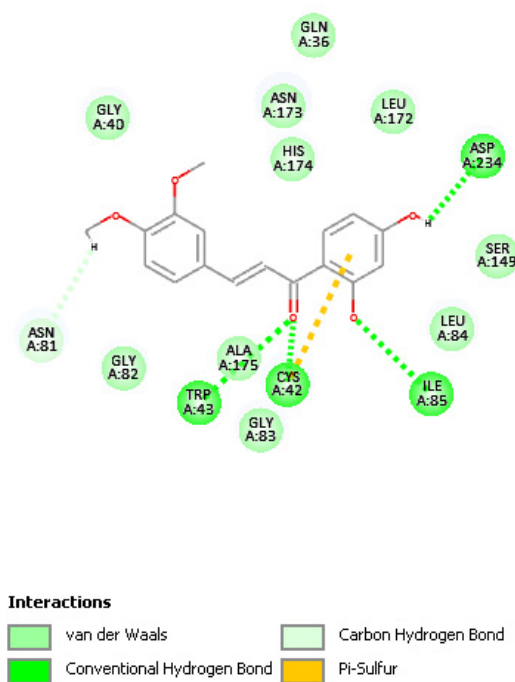

**Figure S7.** 2D interactions between DHDM (**2**) pose 2 and the active site of Falcipain-2, after calculating bonding energy.

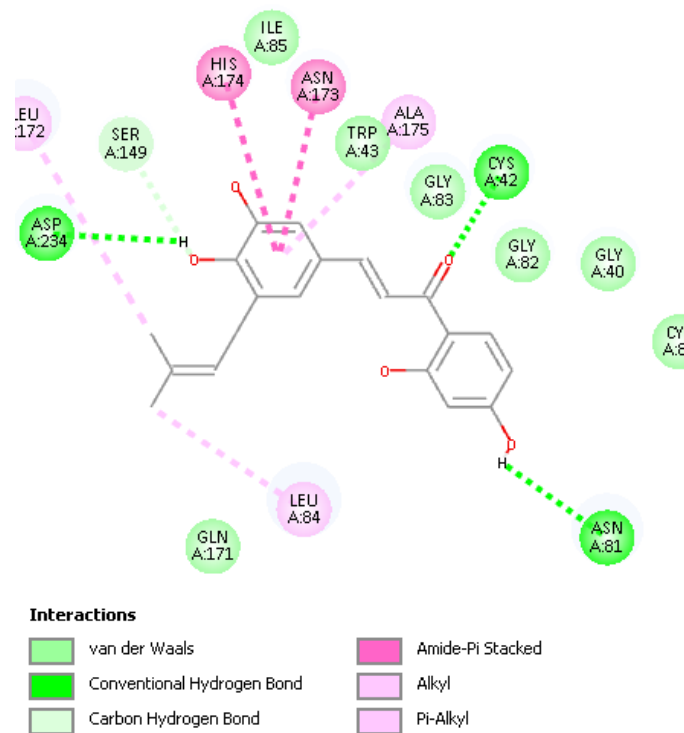

**Figure S8.** 2D interactions between docked pose 3 of 5-Prenylbutein and the active site of Falcipain-2.

Table S1. Comparison between bond distances in the crystal and DFT calculated

| Butein Bond | Xray distance (ESD) | Calculated distance |
|-------------|---------------------|---------------------|
| O2-C4       | 1.375(2)            | 1.377               |
| O1-C3       | 1.380(2)            | 1.381               |
| O5-C13      | 1.360(2)            | 1.374               |
| O3-C9       | 1.262(2)            | 1.280               |
| C3-C4       | 1.395(2)            | 1.420               |
| C1-C7       | 1.458(2)            | 1.457               |
| C10-C15     | 1.404(2)            | 1.421               |
| C10-C9      | 1.461(2)            | 1.476               |
| C13-C14     | 1.395(2)            | 1.424               |
| C3-C2       | 1.374(2)            | 1.391               |
| C2-C1       | 1.403(2)            | 1.420               |

|         |          |       |
|---------|----------|-------|
| C1-C6   | 1.393(2) | 1.417 |
| C4-C5   | 1.382(2) | 1.400 |
| C10-C11 | 1.418(2) | 1.440 |
| C13-C12 | 1.380(2) | 1.398 |
| C7-C8   | 1.335(2) | 1.364 |
| C8-C9   | 1.460(3) | 1.468 |
| C14-C15 | 1.372(3) | 1.389 |
| C5-C6   | 1.387(2) | 1.399 |
| C11-C12 | 1.378(2) | 1.403 |

# **DHDM**

| Bond    | X-ray<br>distance(ESD) | Calculated distance |
|---------|------------------------|---------------------|
| O3-C3   | 1.3650(13)             | 1.375               |
| O5-C9   | 1.2624(13)             | 1.280               |
| O4-C17  | 1.4345(15)             | 1.479               |
| C1-C2   | 1.4146(15)             | 1.424               |
| C2-C3   | 1.3805(15)             | 1.392               |
| C3-C4   | 1.4195(15)             | 1.434               |
| C9-C10  | 1.4521(15)             | 1.475               |
| C8-C7   | 1.3361(16)             | 1.365               |
| C10-C15 | 1.4115(15)             | 1.420               |
| C6-C5   | 1.3918(16)             | 1.401               |
| C13-C12 | 1.3866(16)             | 1.398               |
| C11-C12 | 1.3868(16)             | 1.403               |
| O3-C16  | 1.4300(14)             | 1.456               |
| O7-C13  | 1.3504(13)             | 1.374               |
| O4-C4   | 1.3562(14)             | 1.368               |
| O6-C11  | 1.3529(13)             | 1.360               |
| C1-C6   | 1.3916(15)             | 1.411               |
| C1-C7   | 1.4601(15)             | 1.453               |
| C4-C5   | 1.3854(16)             | 1.402               |
| C9-C8   | 1.4728(15)             | 1.468               |
| C10-C11 | 1.4201(15)             | 1.439               |
| C13-C14 | 1.4072(15)             | 1.413               |
